# Supplementary material
Source: PubMed Central journal article supplement (PMC3208279)

**Figure S1. Expression of IL17-receptors by epithelial and endothelial cells, and IL17 by Th17 cells**

(A) To confirm IL17-receptor expression by corneal epithelial and lymphatic endothelial cells, RNA was isolated and real-time PCR was performed using Taqman mastermix and preformulated primers for IL17-R and GAPDH (Applied Biosystems). (B) Primary human Th17 cells, generated by polarizing peripheral blood CD4<sup>+</sup> T cells in a Th17-inducer cytokine-cocktail (TGFb, IL6 and IL23), were stained with mouse anti-human IL17-FITC monoclonal antibodies (eBioscience Inc.) and analyzed using flow cytometry.

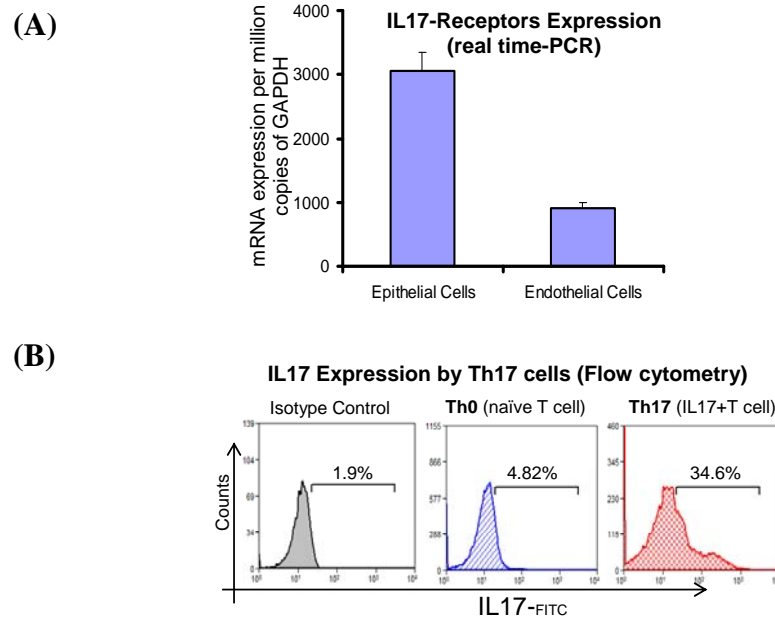

**Figure S2. Expression of different VEGFs by Th17 cells**

To examine whether Th17 cells also express different VEGF species, we conducted real time-PCR and observed that expression levels of VEGF-A, -C, and -D transcripts were very low (minimal to undetectable) in primary human Th17 cells compared to primary human lymphatic endothelial cells (used as positive control).

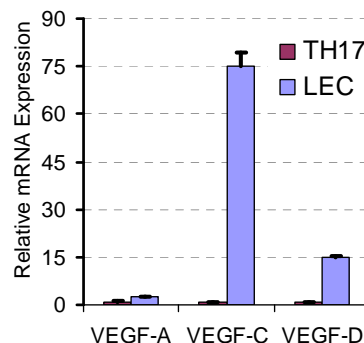

Supplement: supp_blood-2011-01-332049_Document1.pdf [file supp_blood-2011-01-332049_Document1.pdf]
